# Supplementary material for: Improving care for elderly patients living with polypharmacy: protocol for a pragmatic cluster randomized trial in community-based primary care practices in Canada
Source: Springer Nature journal article supplement (doi:10.1186/s13012-019-0904-4), 2019-06-06
Supplement: MOESM4 [file 16777472]

## A Research and QI Collaboration Supporting Practices in Improving Care for Complex Elderly Patients

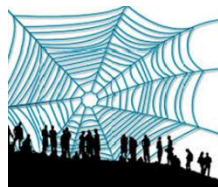

**SPIDER: A Structured Process Informed by Data, Evidence and Research.**

**Learning Collaborative Launch**

**September 14, 2018**

**DFCM (Rooms 303/365), 500 University Avenue, Toronto**

| Time                 | Minutes | Activities                                                                                                                                                                                                              | Lead                                                                |
|----------------------|---------|-------------------------------------------------------------------------------------------------------------------------------------------------------------------------------------------------------------------------|---------------------------------------------------------------------|
| 08:30<br>to<br>08:55 | 25 min  | <b>Welcome</b> <ul style="list-style-type: none"> <li>– Introductions</li> <li>– Launch overview</li> <li>– <b>System Thinking</b> - ‘Clap Focus’</li> </ul>                                                            | Michelle Greiver,<br>Trish O’Brien &<br>Jeremy Rezmovitz            |
| 08:55<br>to<br>09:25 | 30 min  | <b>What is SPIDER?</b> <ul style="list-style-type: none"> <li>– The research project</li> <li>– The evidence base</li> </ul>                                                                                            | Michelle Greiver                                                    |
| 09:25<br>to<br>10:00 | 35 min  | <b>The Quality Improvement Approach</b> <ul style="list-style-type: none"> <li>– <b>Collaboration</b> - ‘Complete the Picture’</li> <li>– Learning collaborative design</li> <li>– Patient engagement</li> </ul>        | Trish O’Brien,<br>Jeremy Rezmovitz<br>& Teams                       |
| 10:00<br>to<br>10:20 | 20 min  | Break                                                                                                                                                                                                                   |                                                                     |
| 10:20<br>to<br>11:05 | 45 min  | <b>Decision-making with Data to Improve Care</b> <ul style="list-style-type: none"> <li>– Reflecting on practice-level data</li> <li>– Deciding on action</li> </ul>                                                    | Noah Ivers                                                          |
| 11:05<br>to<br>12:00 | 55 min  | <b>The Quality Improvement Approach (cont.)</b> <ul style="list-style-type: none"> <li>– Team engagement</li> <li>– QI Coach - ‘improvement enabler’</li> <li>– QI Curriculum</li> <li>– Improvement Pathway</li> </ul> | Trish O’Brien,<br>Christina Southey,<br>Jeremy Rezmovitz<br>& Teams |
| 12:00<br>to<br>13:00 | 60 min  | <b>System Thinking</b> - ‘Clap Focus’<br>Lunch                                                                                                                                                                          |                                                                     |

| Time           | Minutes | Activities                                                                                                        | Lead                                               |
|----------------|---------|-------------------------------------------------------------------------------------------------------------------|----------------------------------------------------|
| 13:00 to 13:30 | 30 min  | <b>Working together for improvement</b><br>'Group Think'                                                          | Jeremy Rezmovitz & Teams                           |
| 13:30 to 14:25 | 55 min  | <b>Charting the Pathway to Improvement</b><br>- Initiating the QI Project Charter                                 | Trish O'Brien, Michelle Greiver & Jeremy Rezmovitz |
| 14:25 to 14:45 | 20 min  | Break                                                                                                             |                                                    |
| 14:45 to 15:00 | 15 min  | <b>Reflecting on what matters</b><br>- 'Mad Tea Party'                                                            | Trish O'Brien & Jeremy Rezmovitz                   |
| 15:00 to 15:45 | 45 min  | <b>Charting the Pathway to Improvement (Cont'd)</b><br>- Incorporating the evidence<br>- Project Charter planning | Trish O'Brien & Michelle Greiver                   |
| 15:45 to 16:00 | 15 min  | <b>Wrap-up</b><br>- Evaluation                                                                                    | Trish O'Brien, Christina Southey & Teams           |
